# Supplementary material for: Genetic Evidence of an Isolation Barrier between Flea Subspecies of Citellophilus tesquorum (Wagner, 1898) (Siphonaptera: Ceratophyllidae)
Source: MDPI journal article supplement (doi:10.3390/insects13020126), 2022-01-25
Supplement: s1 [file s1]

А. Я. Никитин, Л. К. Нечаева

ГИБРИДИЗАЦИЯ ПОДВИДОВ БЛОХ КАК ВОЗМОЖНАЯ ОСНОВА МЕТОДА  
РЕГУЛЯЦИИ ЧИСЛЕННОСТИ ПЕРЕНОСЧИКА

Иркутск

До настоящего времени химические методы являются доминирующими в борьбе с блохами в природных очагах чумы. Однако в связи с наличием определенных отрицательных последствий действия инсектицидов на окружающую среду неослабевают интерес исследователей к разработке более "экологичных" препаратов и методов борьбы на принципиально новой основе.

Способ борьбы с вредными насекомыми путем их стерилизации достаточно хорошо обоснован на уровне теоретических моделей, проверен в лабораторных экспериментах и в ряде случаев был успешно использован на практике ( Ниплинг, 1971; Рукавишников, 1979 ).

На наш взгляд можно, выделить минимум три подхода к регуляции численности насекомых путем их стерилизации: 1 - хемотреплянтами воздействуют непосредственно на естественную популяцию насекомых; 2 - в лабораторных условиях химическими или физическими методами вызывают стерильность обычно самцов, с последующим внедрением их в "регулируемую" популяцию; 3 - используют интродукцию линий, рас, дающих после скрещивания с особями "регулируемой" популяции бесплодное потомство. Все три метода, обычно применяют после химической дезинсекции для уничтожения выжившей части популяции или продлении достигнутой эффективности проведенных мероприятий. Наиболее "экологически" чистым и в большинстве случаев экономически оправданным будет третий подход. Вместе с тем, именно он пока является наименее разработанным.

В двух из трех сибирских очагов чумы основным переносчиком

возбудителя является *Citellaphyllus tesquorum* (Голубинский, Жовтый, Лемишева, 1987). По некоторым данным и в третьем природном очаге этому виду принадлежит значительная роль в эпизоотиях чумы (Машковский, 1987). Вместе с тем, показано (Голубинский, Жовтый, Лемишева, 1987), что в разных очагах обитают два разных подвида этих блох, причем оба хорошо разводятся в инсектарных условиях (Жовтый, Нечаева, 1983). Следовательно, теоретически имеется хороший плацдарм для разработки метода регуляции численности блох за счет интродукции в естественные популяции самцов несвойственных данному очагу подвида насекомых в расчете на малую численность и плохую приспособленность потомков от подобного рода гибридизации.

Для проверки этого предположения в 1990-91 гг. в инсектарии Иркутского противочумного института проведены реципрокные скрещивания лабораторных культур *C. t. altaicus* и *C. t. sungaris*. Сразу же отметим, что гибридизация проходит успешно, хотя численность потомков, приходящихся на одну самку, резко падает (табл. 1). Тем самым подтверждается таксономический статус этих переносчиков.

В табл. 1 приведены некоторые данные, характеризующие уровень приспособленности первого и второго поколения гибридов и родительских особей. Полученные результаты не позволяют говорить о наличии различий в сроках прохождения отдельных стадий онтогенеза. Вместе с тем, в проведенных скрещиваниях подвидов наблюдается уменьшение числа потомков по сравнению с обоими исходными формами. Если выразить этот эффект через формулу Чемберлена, используемую для оценки эффективности химической стерилизации, то получим величину, равную приблизительно 90 %, что на 11 % выше, чем эффективность стерилизации самцов этого вида в лабораторных опытах одним из наиболее мощных для блох на сегодняшний день хемотрепантом тиафентозом (Умаров, 1974).

Таблица 1

Анализ некоторых компонент приспособленности у двух подвидов *C. tesquorum* (*C. t. a.* - *altaicus*; *C. t. s.* - *sungaris*) и гибридов от реципрокных скрещиваний между ними

| N п.п. | Вариант скрещивания               | Время выплода первых личинок по отдельным опытам (сутки) | Минимальные сроки метаморфоза (сутки) | Число потомков от 1 самки за время наблюдений | Вес 10 самок в мг | Среднее число овариол у 1 самки |
|--------|-----------------------------------|----------------------------------------------------------|---------------------------------------|-----------------------------------------------|-------------------|---------------------------------|
| 1      | <i>C. t. a.</i> * <i>C. t. a.</i> | 19                                                       | 45                                    | 51.0                                          | 7                 | 6.4                             |
| 2      | <i>C. t. s.</i> * <i>C. t. s.</i> | 13                                                       | 45                                    | 45.4                                          | 8                 | 10                              |
| 3 F1   | <i>C. t. a.</i> * <i>C. t. s.</i> | 28; 11; 18                                               | 43; 40                                | 3.8; 6.3                                      | 4                 | 6.6                             |
| 4 F1   | <i>C. t. s.</i> * <i>C. t. a.</i> | 28; 13                                                   | 43; 40                                | 1.2; 4.4                                      | 5                 | 6.1                             |
| 5 F2   | 3 F1 * 3 F1                       | 12; 17                                                   | 33                                    | 2.0                                           | -                 | -                               |
| 6 F2   | 4 F1 * 4 F1                       | 12; 17                                                   | 29                                    | 5.4                                           | -                 | -                               |

Таблица 2

Сравнение мерных признаков и уровня их изменчивости у родительских подвидов и их гибридов

| Полусумма по вариантам | Относительная длина |       |       |       | Уровень изменчивости признаков (б) |       |        |       |       |       |        |       |
|------------------------|---------------------|-------|-------|-------|------------------------------------|-------|--------|-------|-------|-------|--------|-------|
|                        | головы              |       | бедра |       | голени                             |       | головы |       | бедра |       | голени |       |
|                        | ♀                   | ♂     | ♀     | ♂     | ♀                                  | ♂     | ♀      | ♂     | ♀     | ♂     | ♀      | ♂     |
| Родители               | 609.6               | 536.0 | 570.8 | 524.7 | 555.0                              | 510.3 | 22.09  | 20.00 | 24.09 | 21.24 | 39.08  | 22.42 |
| F1                     | 620.0               | 545.0 | 596.2 | 532.4 | 575.1                              | 508.3 | 14.74  | 6.24  | 26.46 | 12.09 | 16.11  | 13.82 |
| F2                     | 588.6               | 522.9 | 563.7 | 508.4 | 551.7                              | 489.2 | 32.26  | 19.94 | 39.78 | 28.19 | 39.95  | 28.57 |

Анализ трех мерных признаков (длина головы, бедра и голени третьей пары ног) позволяет сделать следующие предварительные выводы (табл. 2): гибриды первого поколения несколько крупнее, чем полусумма соответствующих размеров их родителей, т.е. наблюдается некоторое доминирование более крупного подвида или проявляется эффект гетерозиса; изменчивость особей первого поколения по совокупности изученных признаков в целом ниже, чем у родителей и гибридов второго поколения; есть некоторые данные, говорящие о том, что у гибридов увеличивается уровень флуктуирующей асимметрии и возрастает частота морфозов.

В заключение хотелось бы подчеркнуть такую немаловажную деталь: рассматриваемый биологический метод борьбы с блохами не только может помочь уменьшить антропогенную нагрузку на среду, но также и привести к получению дополнительной эффективности мероприятий по оздоровлению очага. Во-первых, эволюционно не отшлифованные гибриды могут оказаться неприспособленными к жизни в данных условиях. Во-вторых, если мы считаем, что паразитарная триада является продуктом коэволюции ее элементов, то очень вероятно, что у гибридов может нарушиться способность взаимодействовать с возбудителем и хозяином (носителем инфекции). Причем, из двух событий: усиления или ослабления способности к блокообразованию и передаче возбудителя более вероятным является второе, поскольку любое вмешательство в эволюционно сложившиеся механизмы скорее поведет к нарушению их нормальной работы. Очевидно, при этом мы понимаем всю опасность подобных экспериментов над природой и необходимость тщательного лабораторного анализа соответствия ожидаемых и получаемых результатов.
